# Supplementary material for: Treponema pallidum subsp. pallidum with an Artificially impaired TprK antigenic variation system is attenuated in the Rabbit model of syphilis
Source: PubMed Central journal article supplement (PMC10063172; doi:10.1371/journal.ppat.1011259), 2023-03-20

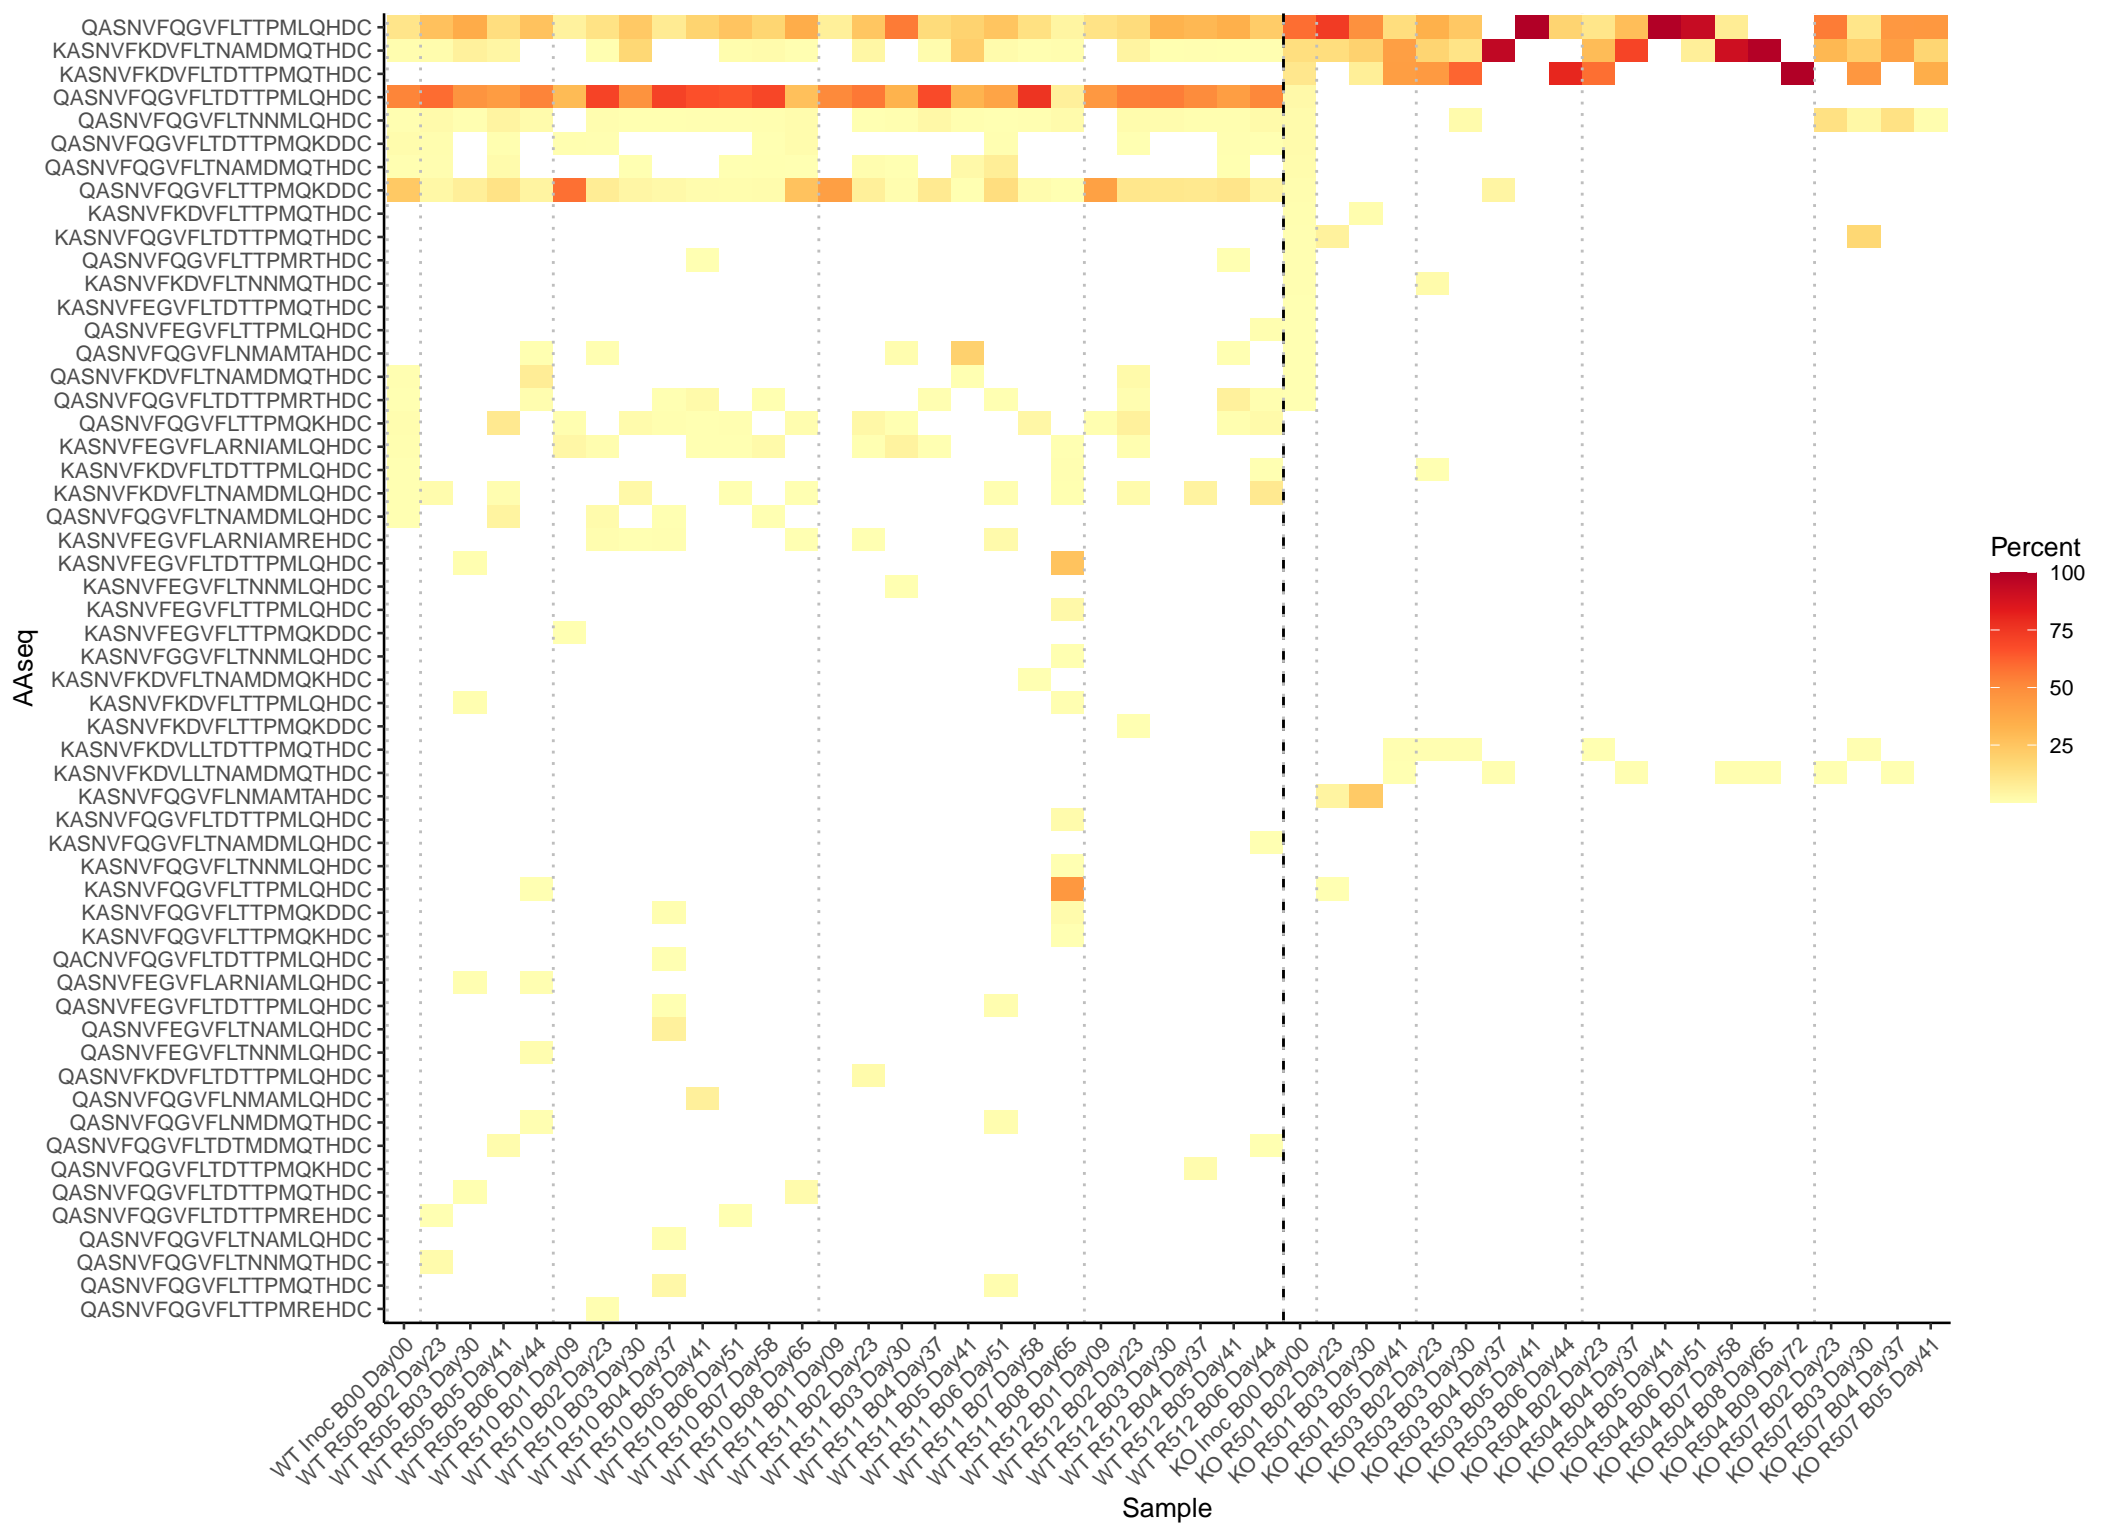

Supplement: ppat.1011259.s005.pdf [file ppat.1011259.s005.pdf]
